# Supplementary material for: Pevonedistat and azacitidine upregulate NOXA (PMAIP1) to increase sensitivity to venetoclax in preclinical models of acute myeloid leukemia
Source: PubMed Central journal article supplement — Haematologica. 2021 Apr 15;107(4):825–35. doi: 10.3324/haematol.2020.272609 (PMC8968901; doi:10.3324/haematol.2020.272609), 2021-04-15
Supplement: 2020_272609_COJOCARI_SUPPL.pdf [file 2020_272609_COJOCARI_SUPPL.pdf]

## Pevedonidstat and azacitidine upregulate NOXA (*PMAIP1*) to increase sensitivity to venetoclax in preclinical models of acute myeloid leukemia

Dan Cojocari,<sup>1\*</sup> Brianna N Smith,<sup>2,4\*</sup> Julie J. Purkal,<sup>1</sup> Maria P. Arrate,<sup>3</sup> Jason D. Huska,<sup>1</sup> Yu Xiao,<sup>1</sup> Agnieszka Gorska,<sup>3</sup> Leah J. Hogdal,<sup>5</sup> Haley E. Ramsey,<sup>3,4</sup> Erwin R. Boghaert,<sup>1</sup> Darren C. Phillips<sup>1#</sup> and Michael R. Savona<sup>3,4,6,7#</sup>

<sup>1</sup>Oncology Discovery, AbbVie Inc., North Chicago, IL; <sup>2</sup>Department of Pediatrics, <sup>3</sup>Medicine, and <sup>4</sup>Program in Cancer Biology, Vanderbilt University School of Medicine, Nashville, TN; <sup>5</sup>Precision Medicine, AbbVie Inc., North Chicago, IL; <sup>6</sup>Vanderbilt-Ingram Cancer Center, Nashville, TN and <sup>7</sup>Center for Immunobiology, Vanderbilt University School of Medicine, Nashville, TN, USA

*\*DC and BNS contributed equally as co-first authors.*

*#DCP and MRS contributed equally as senior authors.*

©2022 Ferrata Storti Foundation. This is an open-access paper. doi:10.3324/haematol.2020.272609

Received: September 17, 2020.

Accepted: April 7, 2021.

Pre-published: April 15, 2021.

Correspondence: *MICHAEL R. SAVONA* - michael.savona@vanderbilt.edu

---

## Supplementary Tables

**Supplementary Table 1:** Sequences of CRISPR crRNAs and oligonucleotides for PCR and sequencing.

| crRNA/DNA                  | Sequence             |
|----------------------------|----------------------|
| <i>BAK1</i> crRNA          | GCTCACCTGCTAGGTTGCAG |
| <i>BAK1</i> gDNA-PCR (F)   | ATGGTTGTGACATGACAGAG |
| <i>BAK1</i> -gDNA-PCR (R)  | ATTTCTTTCCATGGGTGAGG |
| <i>BAK1</i> Sequencing (F) | AGCAACCATGAGAGAAGGGC |
| <i>BAK1</i> Sequencing (R) | CTCCCTGACTCCCAGCTTTG |
| <i>BAX</i> crRNA           | TCGGAAAAAGACCTCTCGGG |
| <i>BAX</i> gDNA-PCR (F)    | GCTCCTTCAGGACACAGGAC |
| <i>BAX</i> -gDNA-PCR (R)   | TGAGAGCAGGGATGTAGCCT |
| <i>BAX</i> Sequencing (F)  | CTTGTCCTTCCCTTGTC    |
| <i>BAX</i> Sequencing (R)  | TGATACCACGATCCCCAGGT |
| <i>ATF4</i> crRNA 1        | AGGTCTCTTAGATGATTACC |
| <i>ATF4</i> crRNA 2        | AGATGACCTTCTGACCACGT |

**Supplementary Table 2:** Primary antibodies used in western blotting and flow cytometry

| Antibody                | Vendor                    | Catalog Number | RRID        |
|-------------------------|---------------------------|----------------|-------------|
| anti-BCL2               | Abcam                     | ab32124        | AB_725644   |
| anti-BCL-X <sub>L</sub> | Abcam                     | ab32370        | AB_725655   |
| anti-MCL1               | Cell Signaling Technology | #94296         | AB_2722740  |
| anti-PUMA               | Abcam                     | ab9645         | AB_296538   |
| anti-NOXA               | Abcam                     | ab13654        | AB_300536   |
| anti-PARP               | BD Biosciences            | 556494         | AB_396433   |
| anti-ATF4               | Cell Signaling Technology | #11815         | AB_2616025  |
| anti-CHOP               | Cell Signaling Technology | #2895          | AB_2089254  |
| anti- $\beta$ -actin    | Sigma-Aldrich             | A2228          | AB_476697   |
| anti-BAX (D2E11)        | Cell Signaling Technology | #5023          | AB_10557411 |
| anti-BAK                | Abcam                     | ab32371        | AB_725624   |
| anti-DNMT1              | Cell Signaling Technology | #5032          | AB_10548197 |
| anti-BIM                | Abcam                     | ab230531       |             |
| human CD45-APC          | Biolegend                 | Clone 2D1      | AB_2566371  |
| murine CD45-PE          | Biolegend                 | Clone 30-F11   |             |
| human CD33-PE-Cy7       | Biolegend                 | Clone P67.6    |             |

**Supplementary Table 3:** AML patient samples mutational background, karyotype, and treatment.

| PATIENT | MUTATIONS AT BIOPSY                  | KARYOTYPE                                   | TREATMENTS FAILED                                 |
|---------|--------------------------------------|---------------------------------------------|---------------------------------------------------|
| AML001  | <i>DNMT3A, FLT3-ITD, IDH1, NPM1</i>  | 46 XY                                       | Conventional chemotherapy                         |
| AML002  | <i>DNMT3A, FLT3-ITD, IDH2, SRSF2</i> | 46 XX, del(12)(p12)[15]                     | Conventional chemotherapy                         |
| AML003  | <i>FLT3-ITD, IDH1</i>                | 46 XY                                       | VEN/AZA                                           |
| AML004  | <i>DNMT3A, FLT3-ITD, IDH2, NPM1</i>  | 46 XX                                       | Conventional chemotherapy + midostaurin           |
| AML005  | <i>TP53, TET2</i>                    | Complex karyotype                           | VEN/AZA                                           |
| AML006  | <i>TP53, FLT3, ASXL1, TET2</i>       | 47,XY,+8[6]/46,idem,add(8)(p11.2),-21[cp14] | Decitabine X 1 week                               |
| AML007  | <i>TP53, FLT3, TET2</i>              | 45,XX,-16,add(17)(p11.2)[18]/46,XX[2]       | Conventional chemotherapy                         |
| AML008  | <i>TP53, DNMT3A</i>                  | Complex karyotype                           | Conventional chemotherapy                         |
| AML 009 | <i>FLT3-ITD, WT1</i>                 | Complex karyotype                           | Conventional chemotherapy, decitabine + sorafenib |

# Supplementary Materials and Methods

## *Reagents*

PEV, VEN and AZA were prepared in DMSO by AbbVie; or PEV (Takeda), AZA (Sigma-Aldrich), VEN (Selleckchem). *In vivo* formulations: PEV: 20% (2-hydroxypropyl)- $\beta$ -cyclodextrin; VEN: 60% phosal 50 propylene glycol, 30% polyethylene glycol-400 and 10% ethanol; AZA: 0.9% sodium chloride.

## *In vivo Murine Modeling for Patient-derived Xenografts*

Animal experiments were conducted in accordance with guidelines approved by the IACUC at Vanderbilt University Medical Center. Female NSGS [NOD-scid IL2Rgnull3Tg(hSCF/hGM-CSF/hIL3)] mice, purchased from Jackson laboratories at 7-9 weeks old, were 18-20 grams on arrival. Food and water were provided ad libitum. They were irradiated with 1Gy cesium irradiation 1 week after arrival to facility. Twenty-four hours later, mice were intravenously xenografted with  $2 \times 10^6$  AML mononuclear cells. Mice were randomized post-cell injection into cages of 5 or 6. Mice without peripheral chimerism of human AML were removed from the study. Chimeric mice were treated with either vehicle, PEV (Takeda) by three times weekly i.p. injection for 4 weeks, AZA (Sigma-Aldrich) daily by i.p. injection for 7 days, VEN (Selleckchem) by gavage for 5d/week for 4 weeks, combination dosing of VEN/AZA, or triple therapy with the same dosing schedules as above. PEV was formulated in 20% (2-hydroxypropyl)- $\beta$ -cyclodextrin [HPbCD], VEN was formulated in 60 % phosal 50 propylene glycol (PG), 30 % polyethylene glycol (PEG) 400 and 10 % ethanol, and 5-azacytidine was formulated with 0.9 % sodium chloride. Peripheral blood was assessed weekly for human chimerism. Chimerism was assessed in the bone marrow and spleen on the final day of the experiment at time of tissue harvest.

## *Cell line-derived Xenografts*

Female Fox Chase SCID Beige (MV4-11 experiment) and Female NOD SCID gamma (NSG) (OCI-AML2-Red-Fluc experiment) mice were purchased from Charles River Laboratories (Wilmington, MA). Body weights upon arrival were 18-20 g. Food and water were provided ad libitum. Animals were on the light phase of a 12 h light: 12 h dark cycle. All animal studies were conducted in accordance with the guidelines established by the AbbVie Institutional Animal Care and Use Committee.

In the flank xenograft model, female Fox Chase SCID Beige (Charles River Laboratories; Wilmington, MA) mice were inoculated with  $5 \times 10^6$  MV4-11 cells subcutaneously into the right flank. Mice were injected with a 0.1 mL inoculum of 1:1 cell mixture in culture media and Matrigel (BD Biosciences, Bedford, MA). When tumors reached approximately 225 mm<sup>3</sup>, the mice were size-matched into treatment and control groups. Mice were treated QD $\times$ 14 PO 50 mg/kg with venetoclax, QD $\times$ 14 IP 60mg/kg with pevonedistat or combination of both. Tumor volume was measured twice per week with electronic calipers and calculated according to the formula,  $(L \times W^2)/2$ . All treatment groups consisted of 8 mice per group.

In the systemic engraftment model, the OCI-AML2-Red-Fluc stable *F.luciferase*-expressing cell line was generated by infecting the parental OCI-AML2 with the RediFect Red-FLuc-Puromycin lentiviral particles (PerkinElmer, Waltham, MA). Female NOD SCID gamma mice (Charles River Laboratories; Wilmington, MA) were inoculated with  $1 \times 10^6$  OCI-AML2-Red-Fluc cells intravenously into the tail vein with 0.2 ml inoculum of culture media. Bioluminescence (BLI) signals were obtained 10 min after IP injection of luciferin (150 mg/kg) using an IVIS imaging system (PerkinElmer, Waltham, MA). Signal intensity was determined by drawing regions of interest around the whole mouse. Data was quantified using Living Image® software (PerkinElmer, Waltham, MA) and mice were size-matched at  $3 \times 10^6$  signal into treatment and control groups. Mice were treated QD $\times$ 14 IP 60mg/kg with PEV, QD $\times$ 14 PO 50 mg/kg with VEN, Q7D $\times$ 3 IV 8 mg/kg with AZA or various combinations. BLI signal was monitored 1-2 times weekly and mice were euthanized when a BLI signal of  $1 \times 10^{10}$  was observed. Whole body ROI to quantify tumor burden with a signal of photons $\times$ sec<sup>-1</sup>. All treatment groups consisted of 6-8 mice. In all studies all groups received appropriate vehicles. PEV was formulated in 20% (2-hydroxypropyl)- $\beta$ -cyclodextrin [HP $\beta$ CD], VEN was formulated in 60 % phosal 50 propylene glycol (PG), 30 % polyethylene glycol (PEG) 400 and 10 % ethanol, and 5-azacytidine was formulated with 0.9 % sodium chloride.

### *Colony-forming Unit (CFU) Assays*

Cyropreserved CD34<sup>+</sup> bone marrow cells (Lonza Bioscience) or primary patient normal bone marrow mononuclear cells were treated with DMSO, VEN(0.01uM)/AZA(0.3uM), or VEN(0.01uM)/AZA(0.3uM)/PEV(0.3uM). Cells were plated in Methocult H4034 Optimum (Stem Cell Technologies, Vancouver, Canada) at a density of 500 cells per mL for purchased CD34<sup>+</sup> cells or  $1 \times 10^4$  cells per mL for normal bone marrow mononuclear cells. After 12-14 days, burst forming

unit-erythroid (BFU-E), colony forming unit-granulocyte, macrophage (CFU-GM) and colony forming unit-granulocyte, erythrocyte, macrophage, megakaryocyte (CFU-GEMM) colonies were counted and analyzed.
